# Supplementary material
Source: PubMed Central journal article supplement (PMC6269207)
Supplement: NIHMS1500149-supplement-1.pdf [file NIHMS1500149-supplement-1.pdf]

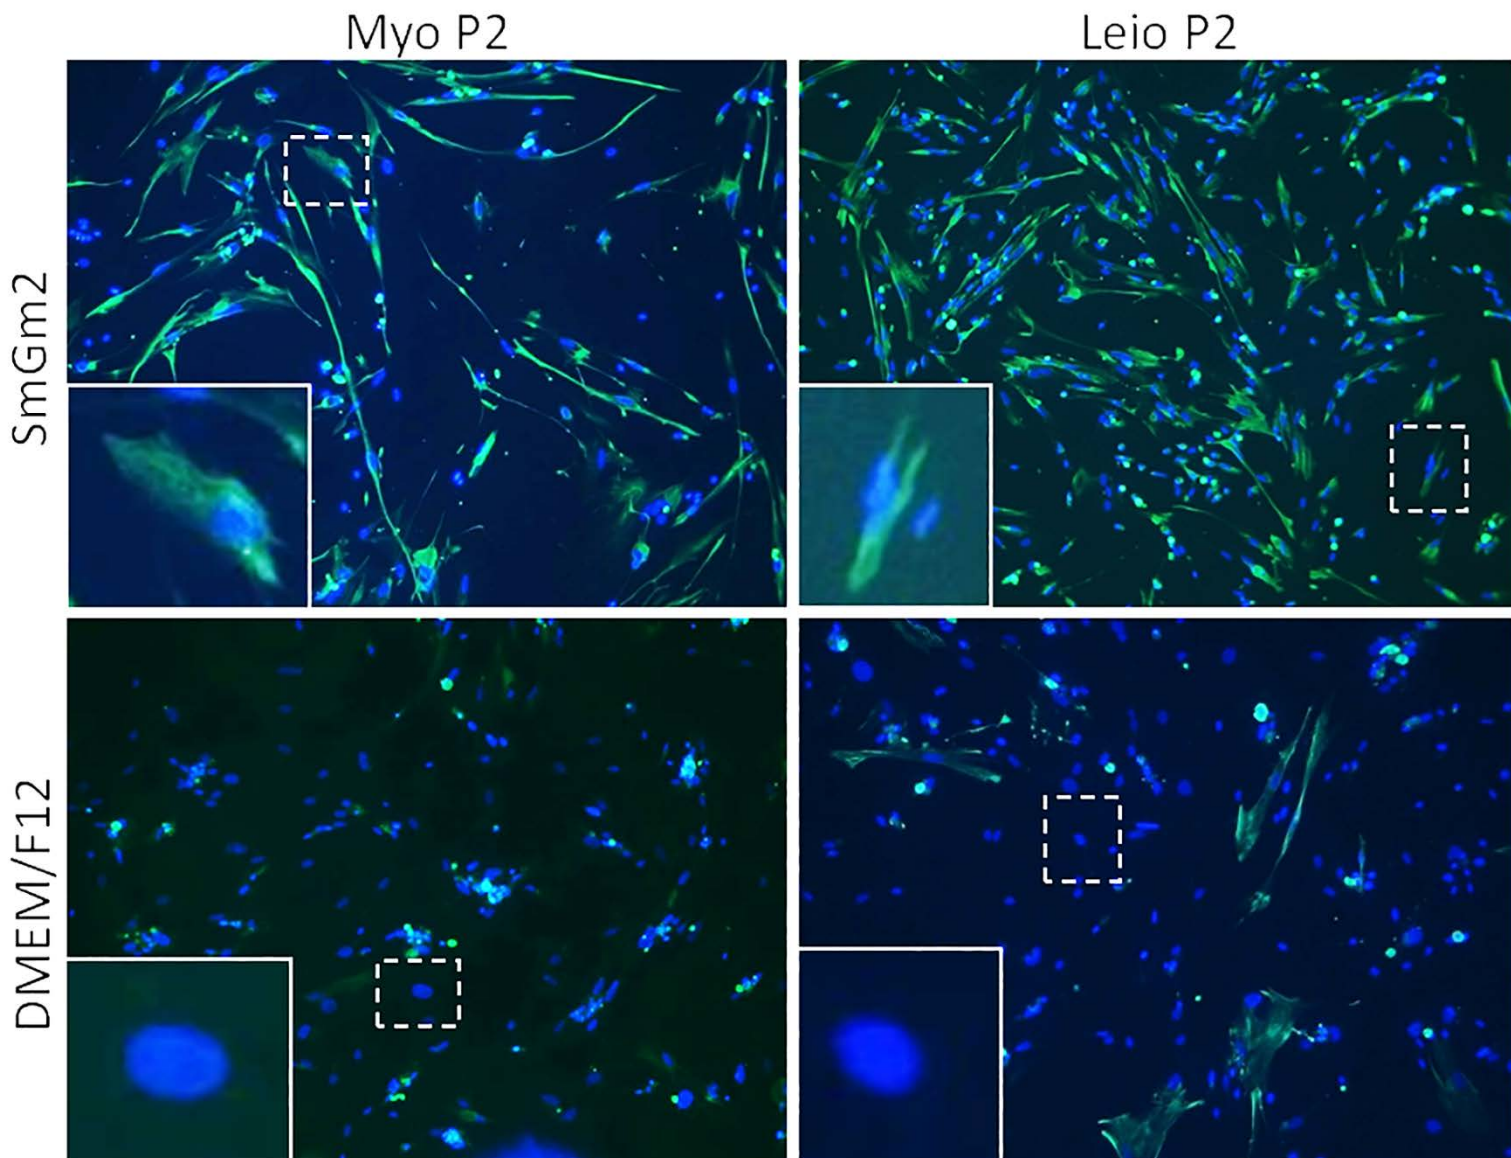

**Supplementary Figure 1. SmGm2 media can maintain the smooth muscle cell populations during long-term culture.** Immunofluorescence staining for desmin (green) demonstrated the minimal loss of smooth muscle cells in primary culture of myometrial (myo) and leiomyoma (leio) cells after two passages (P2) in SmGm2 medium (upper panel). In contrast, cells maintained in DMEM/F12 medium resulted in significant loss of smooth muscle cells (lower panel). A counterstain of DAPI (blue) highlighted all nuclei in culture. Cells outlined with white dotted lines were enlarged and shown at the bottom left corners of the corresponding images.

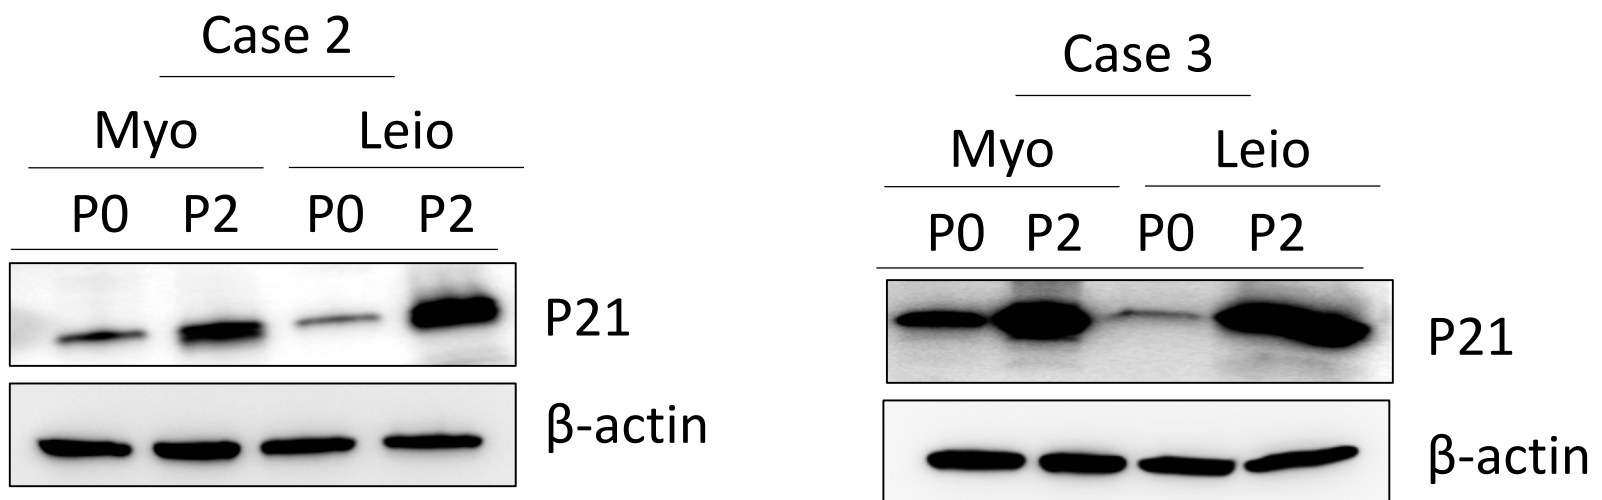

**Supplementary Figure 2.** Western blot analysis of p21 in myometrium (Myo) and leiomyoma (Leio) cells from P0 and P2.  $\beta$ -actin was used as a loading control.

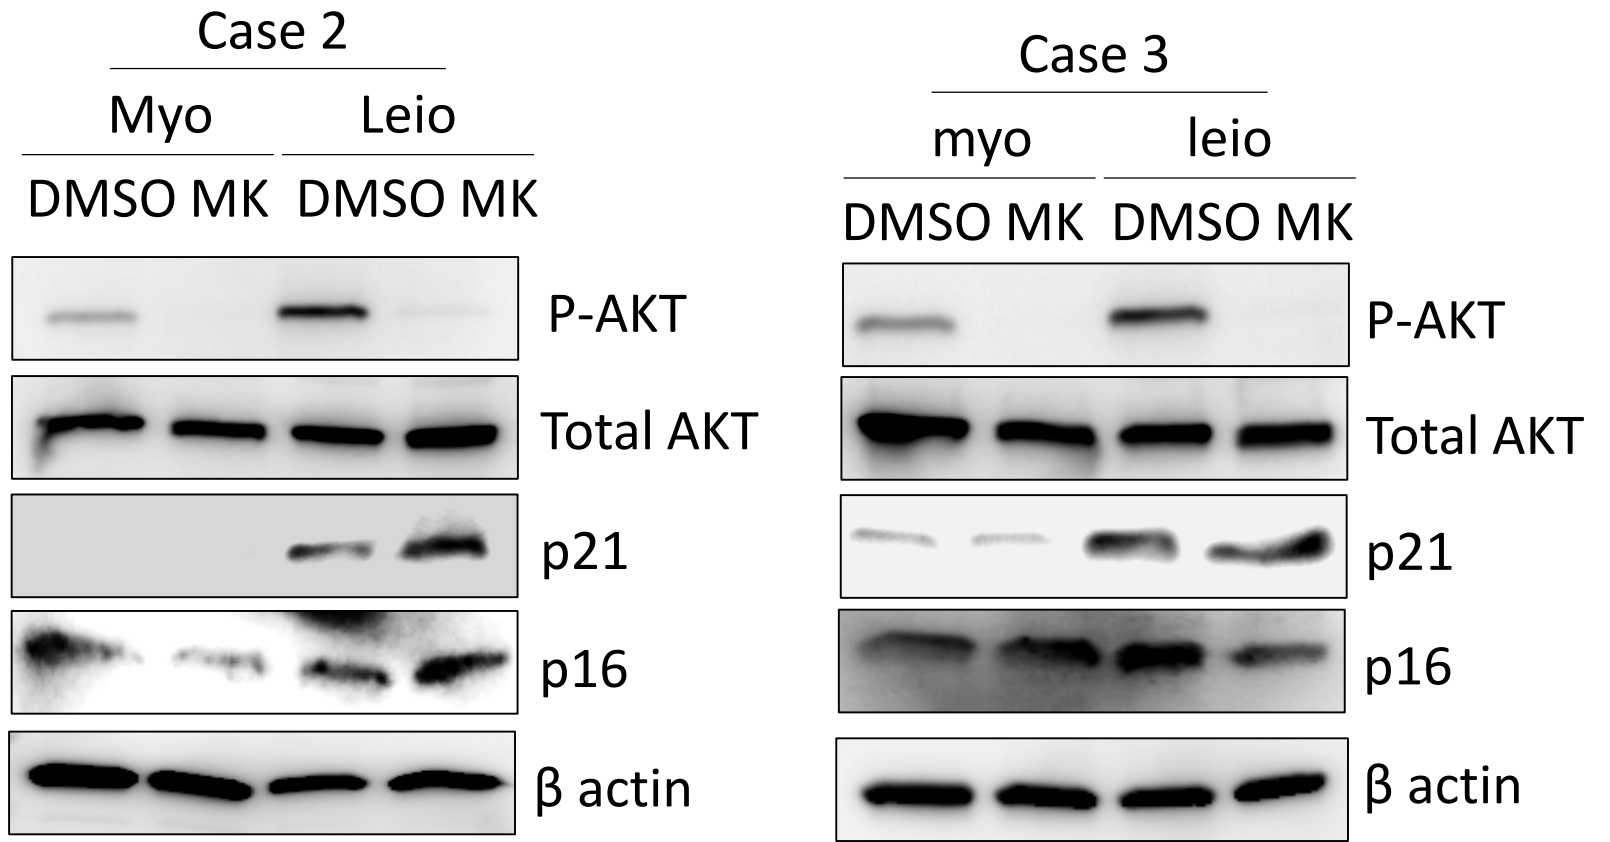

**Supplementary Figure 3.** Western blots analysis of the selected protein products in leiomyoma (Leio) and myometrial (Myo) cells in control (DMSO) and AKT inhibitor (MK2206) treatment.

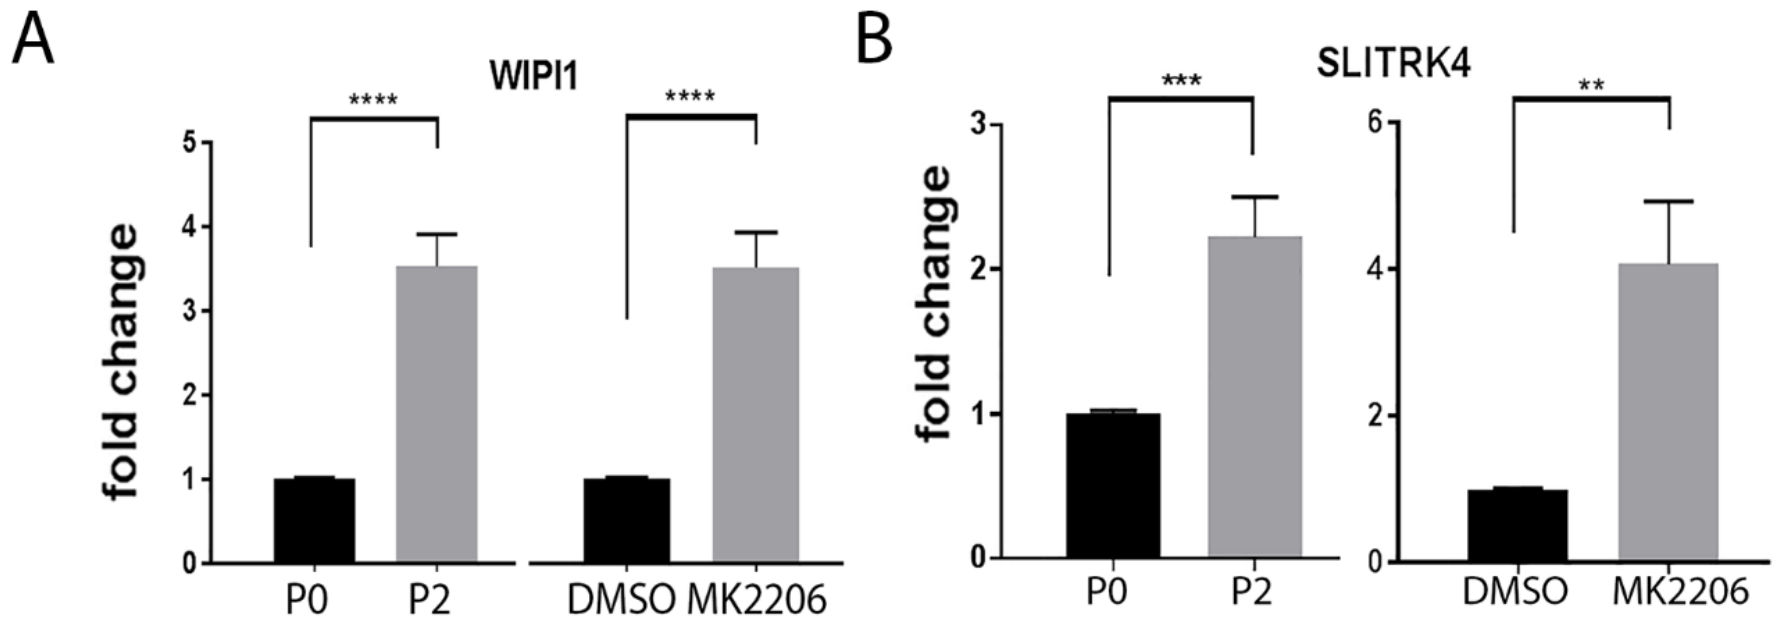

Supplementary Figure 4. RT-PCR analysis of WIPI1 (A) and SLITRK4 (B) expression in replication senescent (P0 vs. P2) and MK2206 treated leiomyoma cells. \* $p < 0.05$ , \*\* $p < 0.01$ , \*\*\* $p < 0.001$ .

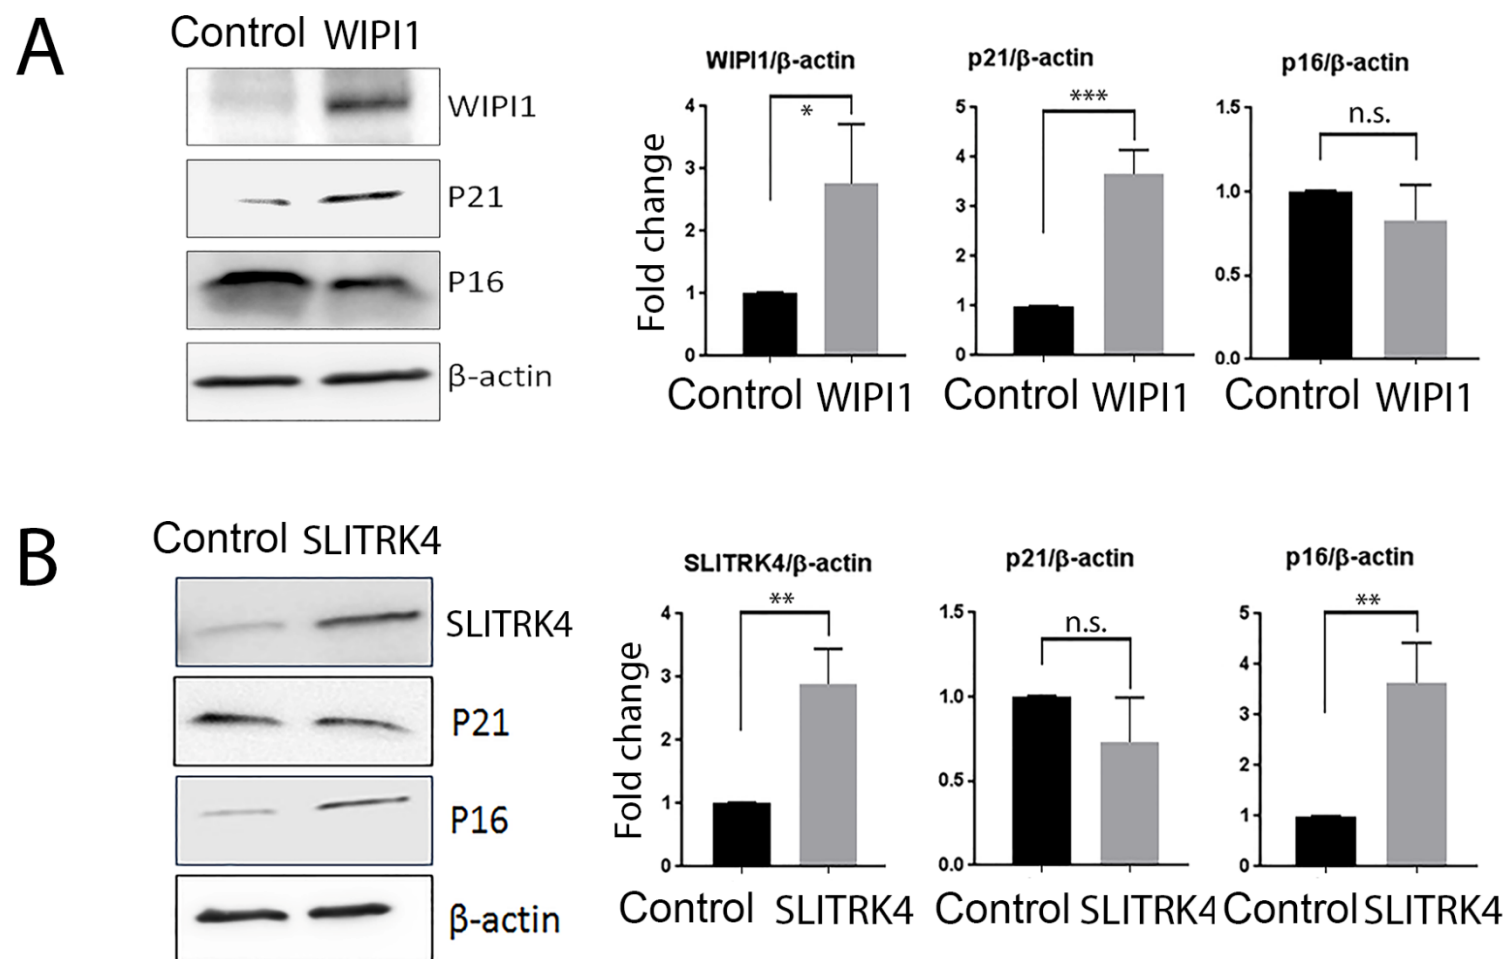

Supplementary Figure 5. Western blots of P16 and P21 expression in primary leiomyoma cells with overexpression of WIP1 and SLITRK4. The band density (right) was quantified (n=3) and expressed as the means  $\pm$  SD. N.s.: no significant change. \* $p < 0.05$ , \*\* $p < 0.01$ , \*\*\* $p < 0.001$ .

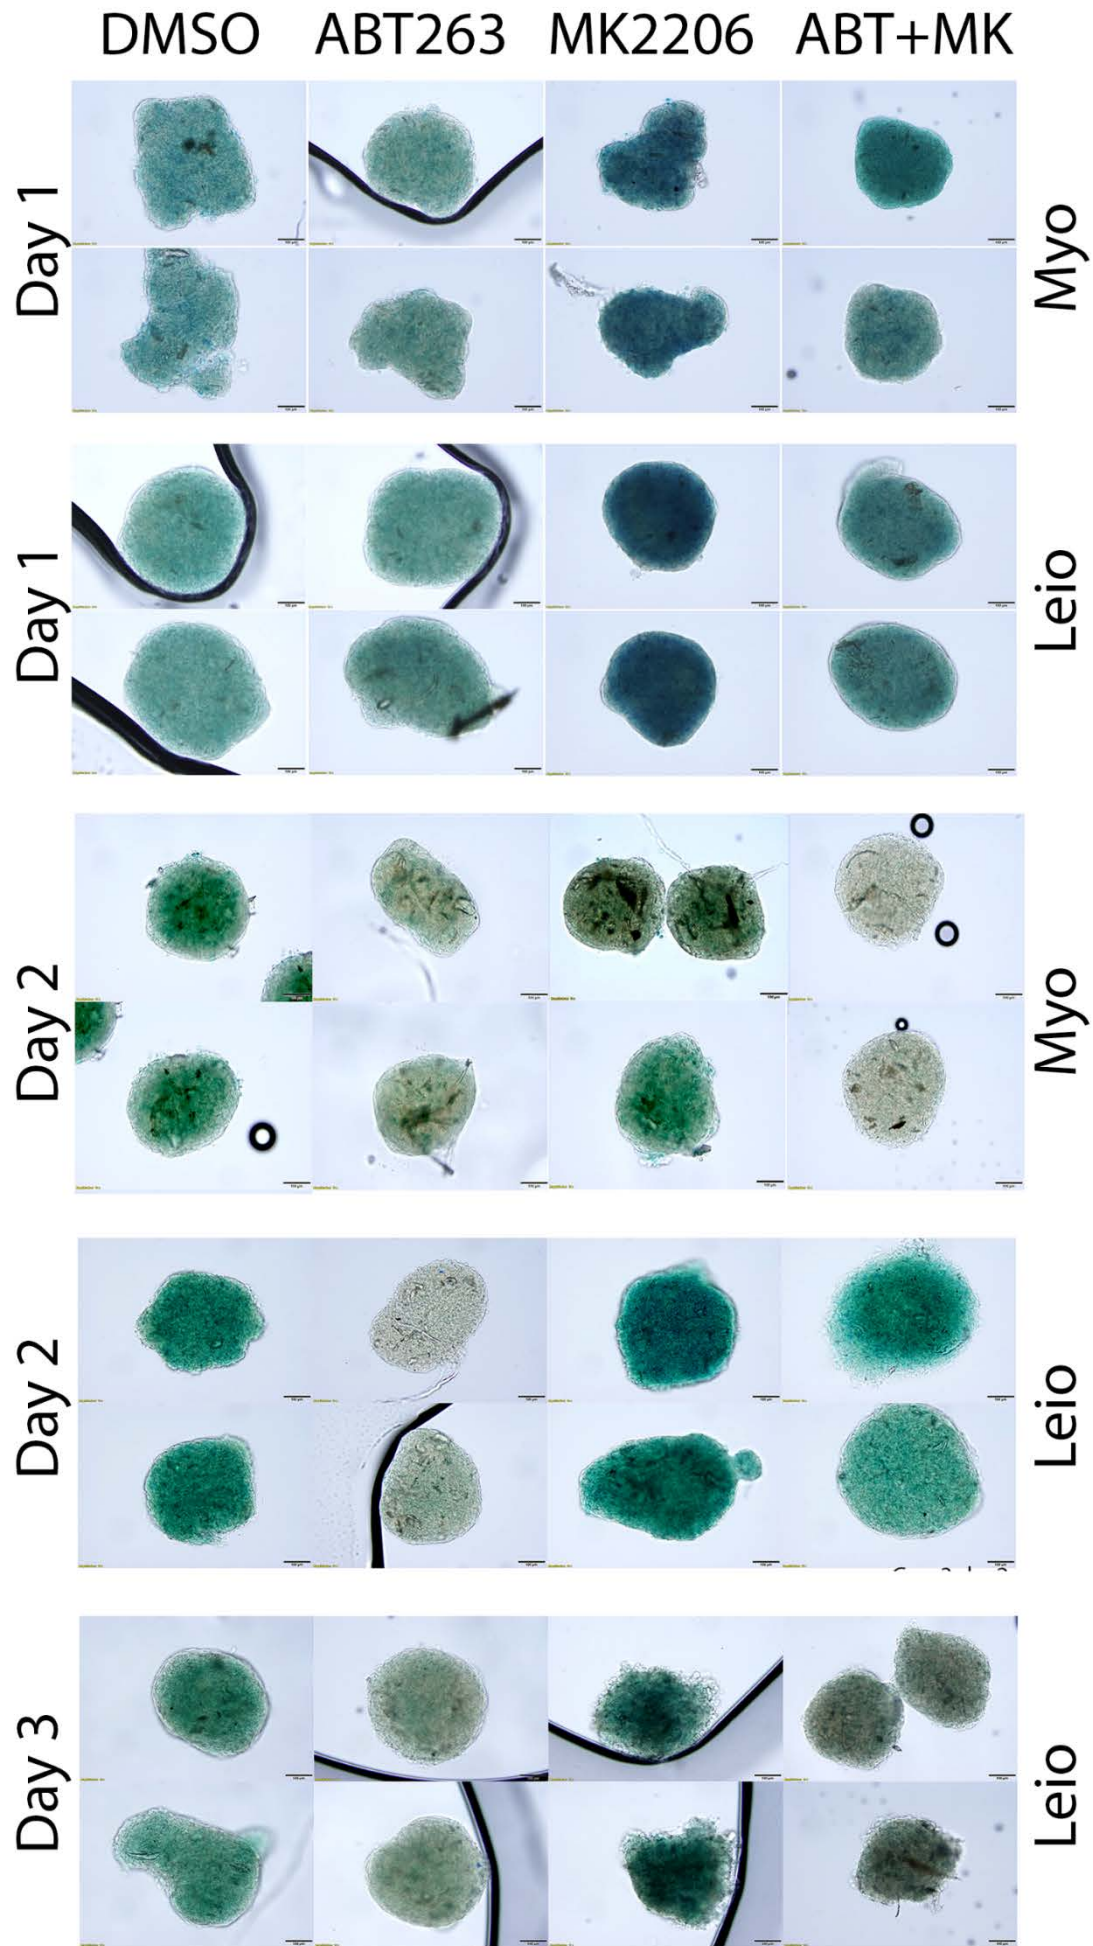

**Supplementary Figure 6.** The relative levels of senescent cells (intensity of green color) detected by SA- $\beta$ -gal staining in leiomyoma (Leio) and myometrium (Myo) spheroids (duplicated) cells treated by control (DMSO), ABT263, MK2206, and combined ABT263+MK2206 from day 1 to day 3.

## Supplementary Tables 1-4

**Suppl Table 1 General information for uterine leiomyomas used in this study**

| Deidenti<br>fy No. | Age<br>(yrs.) | Tumor<br>Size (cm)<br>up to 13 | endometrial phase                       | ethnicity        | HMG2<br>by IHC | MED12<br>mutation   | FH by IHC |
|--------------------|---------------|--------------------------------|-----------------------------------------|------------------|----------------|---------------------|-----------|
| Pt805              | 41            | cm                             | secretory                               | African American | Negative       |                     | Positive  |
| PT818              | 48            | 12 cm                          | proliferative                           | African American | Negative       |                     | Positive  |
| PT822              | 48            | 6.6 cm                         | secretory                               | Asian            | Negative       |                     | Positive  |
| Pt826              | 53            | 6 cm                           | weakly proliferative                    | Caucasian        | Negative       | c.131G>A            | Positive  |
| Pt845              | 48            | 9.5 cm                         | secretory                               | African American | Negative       |                     | Positive  |
| Pt875              | 55            | 8.5 cm                         | proliferative                           | African American | Negative       | c.130 G>C<br>p.G44R | Positive  |
| PT894              | 44            |                                | weakly proliferative                    | African American | Negative       |                     | Positive  |
| PT957              | 48            | 4.5 cm                         | secretory                               | Caucasian        | Negative       |                     | Positive  |
| PT961              | 37            | 7.8 cm                         | proliferative                           | Hispanic/Latina  | Negative       |                     | Positive  |
| PT963              | 44            | 10 cm                          | proliferative                           | Caucasian        | Positive       |                     | Positive  |
| PT965              | 40            | 6.5 cm                         | inactive to weakly proliferative        | unknown          | Negative       | c.131G>A            | Positive  |
| PT971              | 35            | 10.2 cm                        | proliferative                           | African American | Negative       |                     | Positive  |
| PT975              | 40            | 14.5 cm                        | proliferative                           | Caucasian        | Negative       |                     | Positive  |
| PT1013             | 46            | 7 cm                           | secretory                               | unknown          | Negative       | c.130G>A            | Positive  |
| PT1018             | 40            | 4 cm                           | basal                                   | Caucasian        | Negative       | c.131G>T            | Positive  |
| PT1019             | 43            |                                | proliferative                           | African American | Negative       | c.131G>A            | Positive  |
| PT1021             | 43            | 9 cm                           | Inactive                                | unknown          | Positive       |                     | Positive  |
| PT1022             | 44            | 25 cm                          | proliferative                           | Caucasian        | Negative       | c.131G>A            | Positive  |
| PT1025             | 46            | 10 cm                          | weakly proliferative                    | unknown          | Negative       |                     | Positive  |
| PT1031             | 43            | 5.5 cm                         | Weakly proliferative to early secretory | African American | Negative       | c.131G>A            | Positive  |
| PT950              | 44            | 6.5 cm                         | proliferative                           | African American | Positive       |                     | Positive  |
| PT976              | 50            | 18 cm                          | secretory                               | African American | Negative       | c.131G>A            | Positive  |
| PT983              | 44            | 6 cm                           | inactive                                | Caucasian        | Negative       | c.130G>C            | Positive  |
| PT999              | 46            | 17 cm                          | inactive                                | African American | Negative       |                     | Positive  |
| PT1007             | 48            | 6.5 cm                         | secretory                               | African American | Negative       |                     | Positive  |
| PT1008             | 47            | 5 cm                           | inactive                                | African American | Negative       | c.131G>A            | Positive  |
| PT1028             | 45            | 8.5 cm                         | weakly proliferative                    | Caucasian        | Negative       |                     | Positive  |
| PT1038             | 49            | 6.1 cm                         | secretory                               | Caucasian        | Negative       | c.131G>A            | Positive  |

**Suppl Table 2 Antibody information**

---

| Antibody            | Vendor         | Catalog number | Concentration |
|---------------------|----------------|----------------|---------------|
| WIP1                | Cell Signaling | 12124S         | 1:100         |
| SLITRK4             | Invitrogen     | PA5-20481      | 1:100         |
| PAKT                | Cell Signaling | 12694          | 1:200         |
| P21                 | Dako           | M7202          | 1:50          |
| P16                 | BIOCARE        | ACR3007C       | 1:50          |
| Ki67                | Dako           | M7240          | 1:100         |
| ER                  | Thermo         | RM-9101S       | 1:200         |
| PR                  | Dako           | M3569          | 1:1600        |
| Smooth muscle actin | Dako           | M0851          | 1:100         |
| HMGA2               | Biocheck,inc   | 59170AP        | 1:500         |
| FH                  | Santa Cruz     | sc-100743      | 1:200         |

---



**Suppl Table 3 Primers for RT-PCR**

---

| Gene     | Primers F                      | primers R                     |
|----------|--------------------------------|-------------------------------|
| SGIP1    | CCT GTT GCA GCA GCA TTT AC     | CTG GGC AGA CAC CTG ATA TTT   |
| FAM108C1 | GCA ACA TCT TCT CCT ACG ACT AC | CCC TAC ATT CAG CTC TCA TTC C |
| WIPI1    | CCA ATT CTT ACC TGG CCT ATC C  | GGT AGT TGG TAG CAG CCA TAA A |
| SLITRK4  | GCC AGT GCC TCT GTC TAT TT     | GCC ACT GAC ACC TAT GCT ATT   |

---

**Suppl Table 4 significantly dysregulated genes in several pathways**

| <b>Hypoxia</b> | <b>Inflammation</b> | <b>P53 path</b> | <b>Estrogen Response</b> | <b>AKT path</b> | <b>DNA repair</b> |
|----------------|---------------------|-----------------|--------------------------|-----------------|-------------------|
| LOX            | DCBLD2              | Gene            | TFPI2                    | Gene            | Gene              |
| KDELR3         | AXL                 | IRAK1           | PRDX4                    | TRIB3           | DFNA5             |
| P4HA2          | TIMP1               | SEC61A1         | CCND1                    | AP2M1           | SEC61A1           |
| TGFBI          | SLC31A1             | RNF19B          | MGST1                    | ARPC3           | DAD1              |
| STC2           | SELS                | S100A4          | TST                      | CALR            | ERCC2             |
| GBE1           | PLAUR               | MKNK2           | GLRX                     | PIN1            | BOLA2             |
| GLRX           | ADORA2B             | TOB1            | PFKP                     | HSP90B1         | GUK1              |
| PFKP           | NLRP3               | PPM1D           | PAPSS2                   | ACTR2           | DGUOK             |
| LXN            | CCL20               | FOXO3           | ATOX1                    | PRKAG1          | GTF2H5            |
| GAPDH          | NAMPT               | BTG1            | MYOF                     | CFL1            | RPA3              |
| ALDOC          | MYC                 | NDRG1           | HSPB8                    | ACTR3           | POLR2G            |
| ALDOA          | CSF3                | NOTCH1          | PDLIM1                   | ARHGDI1         | NME1              |
| S100A4         | RGS16               | STOM            | TOB1                     | MAP3K7          | ERCC1             |
| MAP3K1         | NDP                 | PPP1R15A        | ISG20                    | ACACA           | TAF10             |
| SLC2A3         | TNFRSF1B            | DDIT4           | TFAP2C                   | CLTC            | RDBP              |
| CDKN1C         | PTGER4              | RGS16           | CYP26B1                  | PPP1CA          | SDCBP             |
| FOXO3          | PTPRE               | RALGDS          | CKB                      | MAPKAP1         | ADA               |
| BTG1           | BST2                | PTPRE           | ID2                      | PTEN            | ELL               |
| NDRG1          | NFKB1               | UPP1            | FOXC1                    | DAPP1           | STX3              |
| TGFB3          | CD14                | ZBTB16          | PGR                      | NCK1            |                   |
| ISG20          | HBEGF               | TM4SF1          | CXCL12                   | CXCR4           |                   |
| ETS1           | KLF6                | IER5            | KLF4                     | CDKN1B          |                   |
| FOSL2          | IL6                 | HBEGF           | SOD2                     | MKNK2           |                   |
| PPP1R15A       | CCL2                | KLF4            | JUNB                     |                 |                   |
| TIPARP         | ICAM1               | TSC22D1         | ZFP36                    |                 |                   |
| DDIT4          | BTG2                | JUN             | FOS                      |                 |                   |
| MAFF           | RGS1                | BTG2            | PCP4                     |                 |                   |
| NFIL3          | IRF1                | TXNIP           |                          |                 |                   |
| PFKFB3         | IRAK2               | ATF3            |                          |                 |                   |
| PIM1           | IL1B                | FOS             |                          |                 |                   |
| STC1           | CALCRL              |                 |                          |                 |                   |
| JUN            | IL8                 |                 |                          |                 |                   |
| KLF6           | SELE                |                 |                          |                 |                   |
| IL6            | NFKBIA              |                 |                          |                 |                   |
| ATF3           | CX3CL1              |                 |                          |                 |                   |
| TNFAIP3        |                     |                 |                          |                 |                   |
| CXCR7          |                     |                 |                          |                 |                   |
| EFNA1          |                     |                 |                          |                 |                   |
| ZFP36          |                     |                 |                          |                 |                   |
| FOS            |                     |                 |                          |                 |                   |
